# Supplementary material for: Changes of Phytochemical Components (Urushiols, Polyphenols, Gallotannins) and Antioxidant Capacity during Fomitella fraxinea–Mediated Fermentation of Toxicodendron vernicifluum Bark
Source: PubMed Central journal article supplement (PMC6412378; doi:10.3390/molecules24040683), 2019-02-14
Supplement: molecules-24-00683-s001.pdf [file molecules-24-00683-s001.pdf]

**Changes of Phytochemical Components (Urushiols, Polyphenols and Gallotannins)  
and Antioxidant Capacity during *Fomitella fraxinea*-mediated Fermentation of  
*Toxicodendron vernicifluum* Bark**

**Da-Ham Kim<sup>1</sup>, Min-Ji Kim<sup>1</sup>, Dae-Woon Kim<sup>1</sup>, Gi-Yoon Kim<sup>1</sup>, Jong-Kuk Kim<sup>1</sup>, Han-Seok Choi<sup>2</sup>,  
Young-Hoi Kim<sup>1</sup> and Myung-Kon Kim<sup>1\*</sup>**

<sup>1</sup> Department of Food Science and Biotechnology, Chonbuk National University, Jeonju 54896,  
Jeonbuk, Republic of Korea

<sup>2</sup> Department of Agriculture and Fisheries Processing, Korea National College of Agriculture and  
Fisheries, Jeonju 54874, Jeonbuk, Republic of Korea

\* Correspondence: [kmyuko@jbnu.ac.kr](mailto:kmyuko@jbnu.ac.kr) (M. K. K.); Tel.: +82-63-270-2551 (M. K. K.); +82-63-270-  
2572 (M. K. K.)

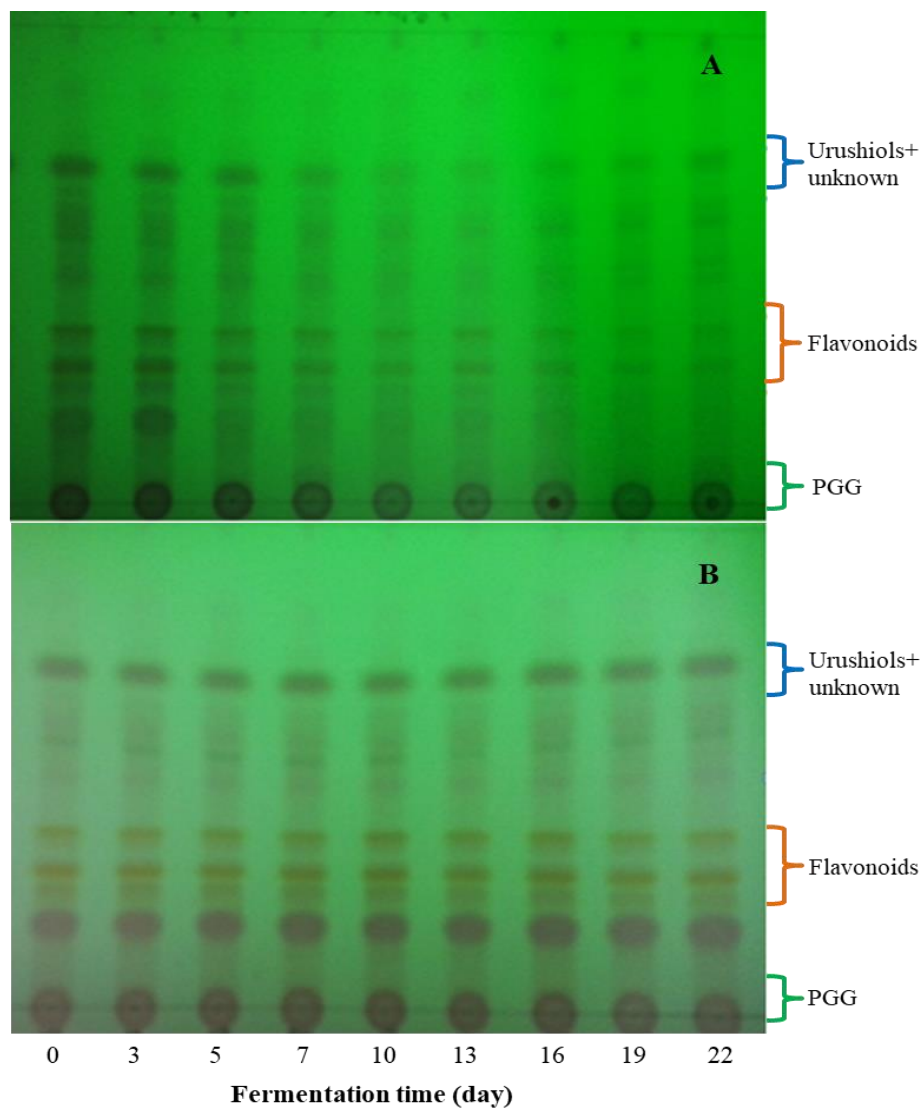

**Figure S1.** Profile comparison of thin layer chromatography (TLC) during 22 days fermentation of TVSB by *F. fraxinea*. **A**, fermentation during 22 days at 25 – 26 °C after *F. fraxinea* inoculation; **B**, fermentation during 22 days at 25 – 26 °C without *F. fraxinea* inoculation. TLC was performed on silica gel 60 F<sub>254</sub> with chloroform–methanol–water (65:35:10, v/v/v, lower phase) as the developing solvent. The spots were detected at UV (254 nm).

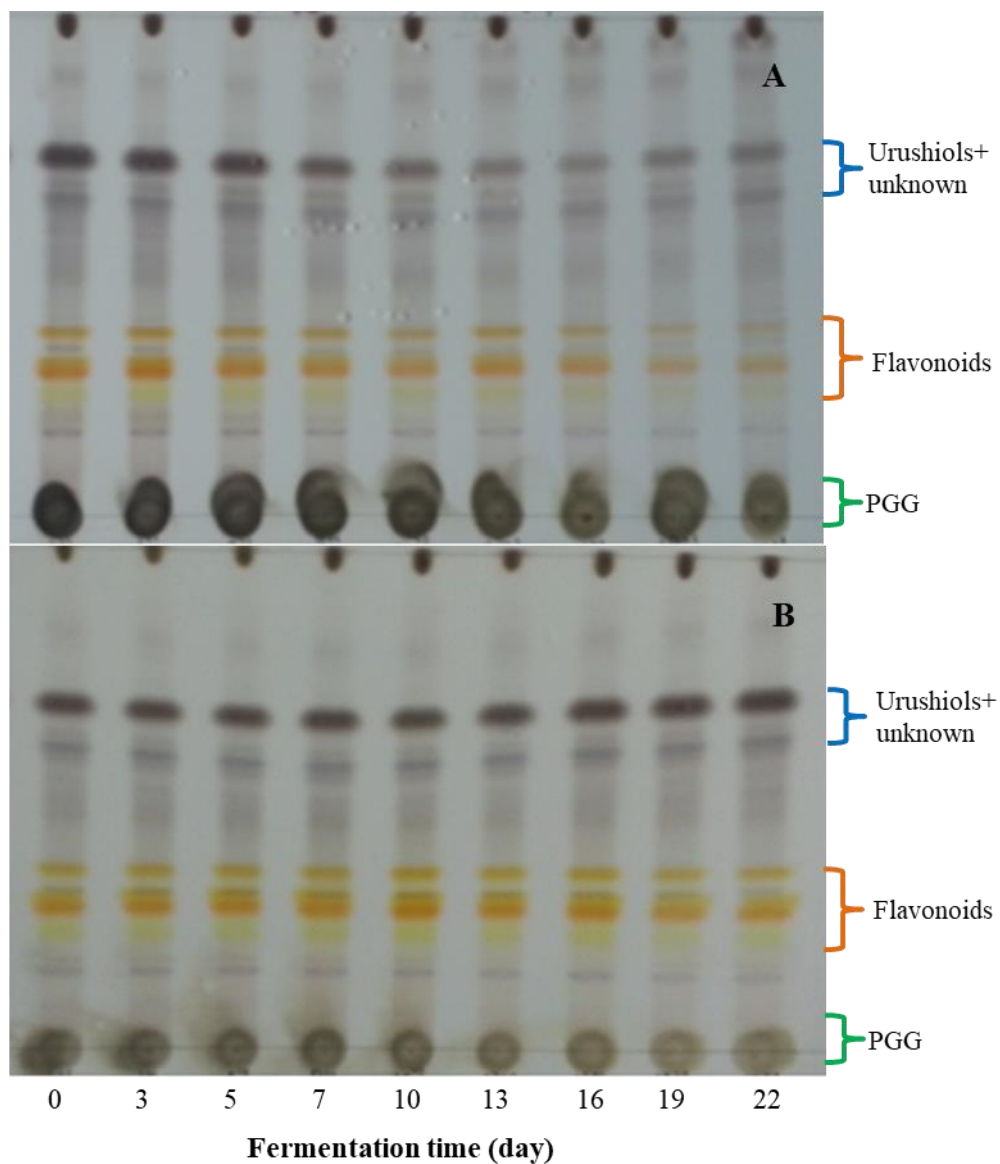

**Figure S2.** Profile comparison of thin layer chromatography (TLC) during 22 days fermentation of TVSB by *F. fraxinea*. **A**, fermentation during 22 days at 25 – 26 °C after *F. fraxinea* inoculation; **B**, fermentation during 22 days at 25 – 26 °C without *F. fraxinea* inoculation. TLC was performed on silica gel 60 F<sub>254</sub> with chloroform–methanol–water (65:35:10, v/v/v, lower phase) as the developing solvent. The spots were detected by spraying 10% CuSO<sub>4</sub> in 8% sulfuric acid, followed by heating at 110 °C for 10 min.

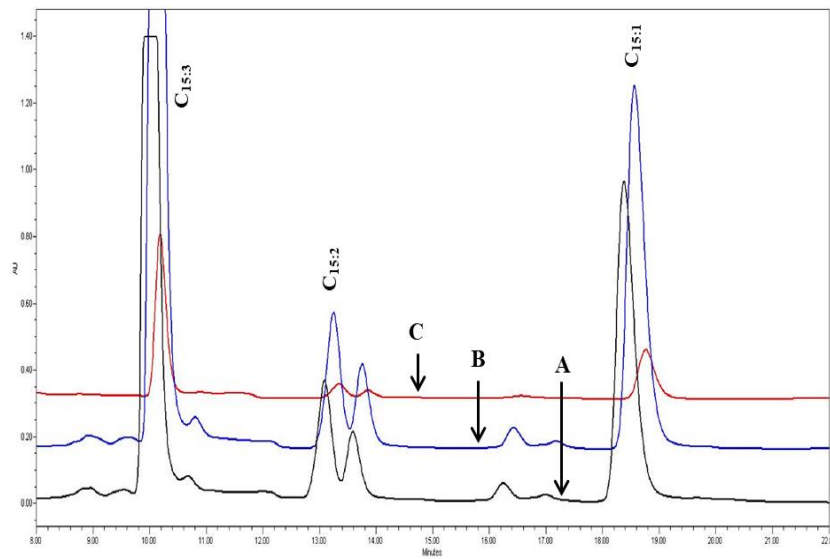

**Figure S3.** Profile comparison of HPLC of urushiols after 22 days fermentation of TVSB by *F. fraxinea*. **A**, 0 day (after sterilization at 121 °C for 30 min); **B**, after 22 days without *F. fraxinea* inoculation; **C**, after fermentation during 22 days after *F. fraxinea* inoculation.

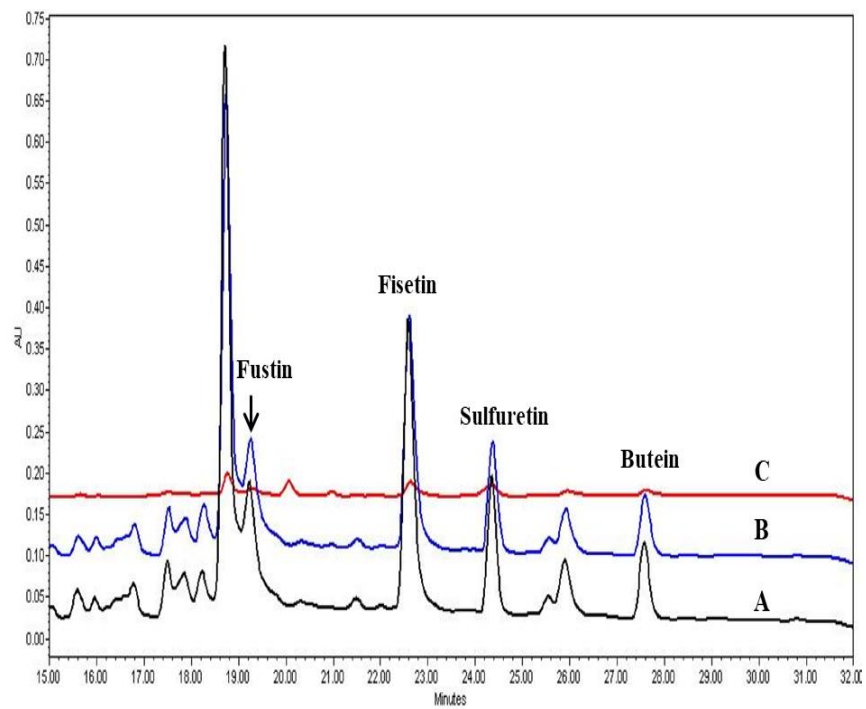

**Figure S4.** Profile comparison of HPLC of flavonoids after 22 days fermentation of TVSB by *F. fraxinea*. **A**, 0 day (after sterilization at 121 °C for 30 min); **B**, after 22 days without *F. fraxinea* inoculation; **C**, after fermentation during 22 days after *F. fraxinea* inoculation.
